# Supplementary material for: Does elevated atmospheric CO2affect soil carbon burial and soil weathering in a forest ecosystem?
Source: PeerJ. 2018 Jul 27;6:e5356. doi: 10.7717/peerj.5356 (PMC6065474; doi:10.7717/peerj.5356)
Supplement: Supplemental Information 1 — Raw data for 137Cs, 210Pb, 40K, 226Rn, and soil bulk density under elevated CO2 concentration. [file peerj-06-5356-s001.xlsx]

## Sheet: Cs-137
Cs-137	ambient CO2 soil cores
	core aCO2_4a	core aCO2_4a	core aCO2_4a		core aCO2_4c	core aCO2_4c	core aCO2_4c		core aCO2_5a	core aCO2_5a	core aCO2_5a		core aCO2_5c	core aCO2_5c	core aCO2_5c
sample #	depth (cm)	activity (Bq/Kg)	error (Bq/kg)	sample #	depth (cm)	activity (Bq/Kg)	error (Bq/kg)	sample #	depth (cm)	activity (Bq/Kg)	error (Bq/kg)	sample #	depth (cm)	activity (Bq/Kg)	error (Bq/kg)
1a	1	8.2	1.2	160a	1	9.1	0.4	46a rerun	1	3.8	0.5	127a	1	7.5	0.4
2a	3	4.4	0.3	161a	2	10.2	0.5	47a rerun	2	4.8	0.4	128a	2	7.8	0.5
3a	4	10.9	1	162a	3	10.6	0.5	48a	3	5	0.4	129a	3	7.8	0.3
4a	5	11.1	0.7	163a	4	9.8	0.5	49a	4	4.1	0.4	130a	4	7.2	0.3
5a	6	10.5	0.9	164a	5	8.7	0.5	50a	5	3.8	0.4	131a	5	7.2	0.4
6a	7	14.8	0.5	165a	6	9.4	0.6	51a	6	2.4	0.3	132a	6	7.1	0.5
7a	8	16.4	0.5	166a	7	10.2	0.3	52a	7	2.4	0.4	133a	7	7.3	0.6
8a	10	13.8	0.4	167a	8	9.9	0.6	53a	8	3.3	0.2	134a	8	5.7	0.4
9a	12	15.2	0.4	168a	10	10.7	0.5	54a	10	2.7	0.3	135a	10	7.6	0.4
10a	14	10	0.4	169a	12	14	0.4	55a	12	3.1	0.4	136a	12	7.4	0.4
11a	16	6.6	0.5	170a	14	14	0.6	56a	14	3.2	0.4	137a	14	4.1	0.4
12a	17	4.2	0.4	171a	16	11.5	0.4	57a	16	4.9	0.3	138a	16	7.8	0.3
12b	18	1.6	0.3	172a	18	15.7	0.7	58a	18	2.2	0.3	139a	18	7	1.2
13a	20	1.1	0.4	173a	20	7	0.3	185	25	3.2	0.4	140a	20	0.1	0.3
14a	22	0.7	0.3	174a	22	0.3		186	30	1.4	0.4	141a	22	0.5	0.3
15a	24	0.1		181	25	0.5						142a	24	0.3
177	25	5.1	0.5	182	30	0.6						189	25	0.4	0.3
178	30	0.4	0.2									190	30	0.5
Cs-137	elevated CO2 soil cores
	core 1 eCO2_1b	core eCO2_1b	core eCO2_1b		core eCO2_1c	core eCO2_1c	core eCO2_1c		core eCO2_2b	core eCO2_2b	core eCO2_2b		core eCO2_2c	core eCO2_2c	core eCO2_2c
sample #	depth (cm)	activity (Bq/Kg)	error (Bq/kg)	sample #	depth (cm)	activity (Bq/Kg)	error (Bq/kg)	sample #	depth (cm)	activity (Bq/Kg)	error (Bq/kg)	sample #	depth (cm)	activity (Bq/Kg)	error (Bq/kg)
16e	1	9.5	1.5	59e	1	9.1	0.5	31e rerun	1	8.2	0.6	143e	1	7.1	0.5
17e	2	8.1	0.6	60e	2	8	0.4	32e rerun	2	9.3	0.4	144e	2	7.2	0.5
18e	3	7.9	0.2	61e	3	8.3	0.6	33e rerun	3	8.9	0.4	145e	3	7.9	0.5
19e	4	6.6	0.3	62e	4	9	0.4	34e rerun	4	8.8	0.3	146e	4	7.2	0.3
20e	5	6	0.8	63e	5	8.7	0.5	35e	5	9.2	0.4	147e	5	6.9	0.5
21e	6	5.5	0.5	64e	6	9.1	0.3	36e	6	11.6	0.4	148e	6	8.4	0.5
22e	7	3.9	0.5	65e	7	7.6	0.6	37e	7	8.7	0.5	149e	7	8.6	0.4
23e	8	4.6	0.5	66e	8	6.9	0.3	38e	8	11.4	0.5	150e	8	33.2	0.7
24e	10	7.8	0.4	67e	10	9.3	0.5	39e	10	13.3	0.4	151e	10	11.2	0.3
25e	12	8.2	0.4	68e	12	9.2	0.4	40e	12	13.2	0.4	152e	12	12.1	0.5
26e	14	9.9	0.5	69e	14	10.2	0.4	41e	14	9.5	0.5	153e	14	15.6	0.3
27e	16	12.2	0.5	70e (rerun)	16	0.8	0.3	42e	16	4.7	0.5	154e	16	15.4	0.6
28e	18	7	0.3	71e	18	11.9	0.5	43e	18	1.3	0.4	155e	18	11.1	0.2
29e	20	5.6	0.4	72e	20	1	0.2	44e	20	1.5	0.4	156e	20	0.6	0.5
30e	22	6.4	0.3	73e	22	6.3	0.3	45e	22	0.6	0.4	157e	22	0.5	0.2
179	25	4.3	0.4	74e	24	4.4	0.5	183	1.4	0.3		158e	24	0.02
180	30	0.8	0.3	175	25	1.1	0.2	184	0.5	0.3		187	25	4.3	0.4
				176	30	0.6	0.3					188	30	1.1	0.3

## Sheet: Pb-210
Pb-210	ambient CO2 soil cores
	core aCO2_4a	core aCO2_4a	core aCO2_4a		core aCO2_4c	core aCO2_4c	core aCO2_4c		core aCO2_5a	core aCO2_5a	core aCO2_5a		core aCO2_5c	core aCO2_5c	core aCO2_5c
sample #	depth (cm)	activity (Bq/Kg)	error (Bq/kg)	sample #	depth (cm)	activity (Bq/Kg)	error (Bq/kg)	sample #	depth (cm)	activity (Bq/Kg)	error (Bq/kg)	sample #	depth (cm)	activity (Bq/Kg)	error (Bq/kg)
1a	1	92.3	10.5	160a	1	87.7	3.5	46a rerun	1	93.9	4.9	127a	1	84	3.7
2a	3	36.7	2.8	161a	2	70.7	4.1	47a rerun	2	73.8	4.1	128a	2	80.7	4.9
3a	4	67.4	8.6	162a	3	63.4	4	48a	3	63	4.1	129a	3	58.6	2.8
4a	5	64.9	5.5	163a	4	49.9	3.5	49a	4	58.7	3.6	130a	4	49.3	2.9
5a	6	57	7.3	164a	5	32.7	4.2	50a	5	41.3	4	131a	5	36.6	3.3
6a	7	55.7	4	165a	6	39.1	4.4	51a	6	40.6	2.9	132a	6	39.9	4
7a	8	65.3	4	166a	7	49	2	52a	7	36.1	3.9	133a	7	43.8	5.2
8a	10	61.8	3.7	167a	8	50	4.5	53a	8	41.5	2.3	134a	8	43.5	3.1
9a	12	48.7	3.5	168a	10	49.3	3.5	54a	10	30.6	2.7	135a	10	52.4	3.7
10a	14	49.2	3.5	169a	12	64	3.1	55a	12	33.2	4	136a	12	54.9	3.3
11a	16	29.7	5	170a	14	54.3	4.4	56a	14	32.2	4	137a	14	27.2	4.1
12a	17	40.7	4.1	171a	16	51.9	3.1	57a	16	38.9	3.1	138a	16	33.5	2.3
12b	18	32.1	2.6	172a	18	57.8	4.9	58a	18	24.5	3.3	139a	18	106.6	10
13a	20	34.8	4.1	173a	20	39.4	2.5					140a	20	24.2	3.2
14a	22	45	3.1	174a	22	28.2	3.2					141a	22	35.4	2.8
15a	24	43.2	3.8									142a	24	30.2	3.6
Pb-210	elevated CO2 soil cores
	core 1 eCO2_1b	core eCO2_1b	core eCO2_1b		core eCO2_1c	core eCO2_1c	core eCO2_1c		core eCO2_2b	core eCO2_2b	core eCO2_2b		core eCO2_2c	core eCO2_2c	core eCO2_2c
sample #	depth (cm)	activity (Bq/Kg)	error (Bq/kg)	sample #	depth (cm)	activity (Bq/Kg)	error (Bq/kg)	sample #	depth (cm)	activity (Bq/Kg)	error (Bq/kg)	sample #	depth (cm)	activity (Bq/Kg)	error (Bq/kg)
16e	1	145.7	11.3	59e	1	96.8	4.5	31e rerun	1	103.2	4.9	143e	1	111.5	4.5
17e	2	79.9	5.4	60e	2	54.1	3.9	32e rerun	2	80.6	3.7	144e	2	94.4	4.4
18e	3	61.2	2.1	61e	3	68.5	4.8	33e rerun	3	62.2	3.7	145e	3	78.7	4.5
19e	4	43.5	3.1	62e	4	76.7	3.5	34e rerun	4	51.2	2.5	146e	4	56.6	2.9
20e	5	36.5	6.6	63e	5	53.9	4.1	35e	5	43.7	3.6	147e	5	51	4.3
21e	6	36.2	4.2	64e	6	47	2.4	36e	6	47.5	3.1	148e	6	48.3	4.3
22e	7	45.3	4.2	65e	7	50.7	4.6	37e	7	47.1	4.1	149e	7	34.6	3.4
23e	8	32.1	5	66e	8	35.6	2.9	38e	8	41.6	3.9	150e	8	47.8	4.3
24e	10	38.1	3.8	67e	10	41.1	4.3	39e	10	50.6	2.8	151e	10	39.6	2.7
25e	12	34.9	3.2	68e	12	35.4	2.9	40e	12	53.5	2.8	152e	12	34.1	3.6
26e	14	33.8	4.1	69e	14	40.4	2.8	41e	14	46.4	4.4	153e	14	56.6	2.6
27e	16	47.2	4	70e (rerun)	16	37	3.1	42e	16	37.1	4.4	154e	16	57.6	4.2
28e	18	34.4	2.6	71e	18	32.8	2.5	43e	18	37.2	3.5	155e	18	46.1	2
29e	20	36.1	3.8	72e	20	55.2	4	44e	20	31.4	4	156e	20	33.1	4.5
30e	22	26.2	3	73e	22	24.9	2.1	45e	22	27.1	4.2	157e	22	36.8	2.2
				74e	24	33.4	2.7					158e	24	36.8	2.2
						32.1	4.4

## Sheet: K-40
K-40	ambient CO2 soil cores
	core aCO2_4a	core aCO2_4a	core aCO2_4a		core aCO2_4c	core aCO2_4c	core aCO2_4c		core aCO2_5a	core aCO2_5a	core aCO2_5a		core aCO2_5c	core aCO2_5c	core aCO2_5c
sample #	depth (cm)	activity (Bq/Kg)	error (Bq/kg)	sample #	depth (cm)	activity (Bq/Kg)	error (Bq/kg)	sample #	depth (cm)	activity (Bq/Kg)	error (Bq/kg)	sample #	depth (cm)	activity (Bq/Kg)	error (Bq/kg)
1a	1	374.4	25.7	160a	1	498	10.3	46a rerun	1	429.9	13.5	127a	1	425.5	11.4
2a	3	133.2	9.5	161a	2	540.9	11.2	47a rerun	2	497.5	10.8	128a	2	471.6	12.4
3a	4	380.1	23.5	162a	3	531.7	10.9	48a	3	470.4	11.3	129a	3	494.1	8.8
4a	5	463.7	16.7	163a	4	522.5	10.7	49a	4	507	10.1	130a	4	518.6	9
5a	6	534.5	19.5	164a	5	556	11.8	50a	5	505.8	11.8	131a	5	509.1	9.7
6a	7	570	11.8	165a	6	559.7	12.7	51a	6	514	9.2	132a	6	529.4	11.3
7a	8	550.2	11.9	166a	7	553	7.8	52a	7	517.4	11.1	133a	7	541.4	14.1
8a	10	579.2	9.9	167a	8	538	12.8	53a	8	503.5	8	134a	8	529.2	9.6
9a	12	611.8	9.3	168a	10	551.1	10.5	54a	10	516.2	9	135a	10	526.2	10.8
10a	14	599.8	9.7	169a	12	564.2	8.9	55a	12	511.3	11.9	136a	12	518	9.6
11a	16	608.6	13.3	170a	14	534.6	12.1	56a	14	528.2	11.3	137a	14	513.7	11.3
12a	17	598.3	11.9	171a	16	539	9.8	57a	16	522.3	9.9	138a	16	501.4	8.3
12b	18	596.5	8.6	172a	18	655.1	14	58a	18	507.8	10.3	139a	18	1733.8	26.6
13a	20	595	11.9	173a	20	472.7	8.1					140a	20	536.7	10.1
14a	22	552.8	10.5	174a	22	593.6	9.3					141a	22	522.6	9.3
15a	24	603	11.2									142a	24	478.2	10.8
	elevated CO2 soil cores
	core 1 eCO2_1b	core eCO2_1b	core eCO2_1b		core eCO2_1c	core eCO2_1c	core eCO2_1c		core eCO2_2b	core eCO2_2b	core eCO2_2b		core eCO2_2c	core eCO2_2c	core eCO2_2c
sample #	depth (cm)	activity (Bq/Kg)	error (Bq/kg)	sample #	depth (cm)	activity (Bq/Kg)	error (Bq/kg)	sample #	depth (cm)	activity (Bq/Kg)	error (Bq/kg)	sample #	depth (cm)	activity (Bq/Kg)	error (Bq/kg)
16e	1	33.7		59e	1	477.3	12.4	31e rerun	1	451	13.5	143e	1	446.9	12.6
17e	2	439	15.7	60e	2	556.9	10.8	32e rerun	2	542	9.8	144e	2	476.6	12.6
18e	3	470.1	8.6	61e	3	491.5	13.2	33e rerun	3	561.7	10.2	145e	3	494.1	13.3
19e	4	581.6	9	62e	4	542.4	9.9	34e rerun	4	571.5	7.3	146e	4	528.3	9.5
20e	5	422.6	18.8	63e	5	539.2	11.6	35e	5	553.8	9.7	147e	5	545.1	12.1
21e	6	548.4	12.1	64e	6	552.7	8.3	36e	6	532	9.9	148e	6	555.6	12
22e	7	506.6	13.5	65e	7	540.3	13.1	37e	7	546.4	11.7	149e	7	540.2	10.4
23e	8	581.7	13.7	66e	8	482.5	9.4	38e	8	576.7	11.8	150e	8	553.8	12
24e	10	588.2	10.4	67e	10	530.8	12.2	39e	10	547	9.1	151e	10	560.1	8.6
25e	12	589.4	8.6	68e	12	296.2	9.3	40e	12	539.8	9.2	152e	12	550.5	10.8
26e	14	587.5	11.5	69e	14	540.9	8.7	41e	14	557.1	12.7	153e	14	561.8	7.9
27e	16	769.2	10.7	70e (rerun)	16	561.1	9.9	42e	16	579.7	13	154e	16	566.3	11.9
28e	18	613.1	7.6	71e	18	520.1	11.2	43e	18	549.5	10.6	155e	18	557.1	7.1
29e	20	572.3	11	72e	20	437.9	7.5	44e	20	602.2	11.9	156e	20	576.6	12.9
30e	22	616.9	7.4	73e	22	525.5	9.1	45e	22	572.6	12.3	157e	22	565.8	8.3
				74e	24	548	12.9					158e	24	558.7	7.7

## Sheet: Ra-226
Ra-226	ambient CO2 soil cores
	core aCO2_4a	core aCO2_4a	core aCO2_4a		core aCO2_4c	core aCO2_4c	core aCO2_4c		core aCO2_5a	core aCO2_5a	core aCO2_5a		core aCO2_5c	core aCO2_5c	core aCO2_5c
sample #	depth (cm)	activity (Bq/Kg)	error (Bq/kg)	sample #	depth (cm)	activity (Bq/Kg)	error (Bq/kg)	sample #	depth (cm)	activity (Bq/Kg)	error (Bq/kg)	sample #	depth (cm)	activity (Bq/Kg)	error (Bq/kg)
1a	1	48.2	9	160a	1	44.8	2.8	46a rerun	1	46.3	3.9	127a	1	44	2.9
2a	3	25.3	2.5	161a	2	48	3.2	47a rerun	2	41.5	3.1	128a	2	42.2	3.7
3a	4	80.3	7.6	162a	3	44.6	3.4	48a	3	40.1	3.3	129a	3	45.8	2.2
4a	5	52.6	4.8	163a	4	47.9	3	49a	4	44.1	2.7	130a	4	45.9	2.4
5a	6	53.2	5.6	164a	5	46.1	3.5	50a	5	43.2	3.4	131a	5	43.7	2.7
6a	7	48.2	2.9	165a	6	50.8	3.8	51a	6	45.1	2.4	132a	6	46.8	3.3
7a	8	49.8	3.4	166a	7	48.7	1.8	52a	7	47.3	3.2	133a	7	46.3	4.2
8a	10	51.5	2.8	167a	8	44	4	53a	8	44.3	1.8	134a	8	47.9	2.5
9a	12	45.4	2.7	168a	10	51.2	3.1	54a	10	46.1	2.3	135a	10	45.2	2.9
10a	14	54.3	2.8	169a	12	51.4	2.5	55a	12	46	3.5	136a	12	45.5	2.6
11a	16	56.6	4.1	170a	14	47.9	3.7	56a	14	42.5	3.3	137a	14	44.6	3.3
12a	17	44.7	3.4	171a	16	46.4	2.7	57a	16	46.2	2.6	138a	16	45.5	2
12b	18	49.8	2.2	172a	18	62.1	4.1	58a	18	42.6	2.8	139a	18	129.3	8.8
13a	20	48	3.4	173a	20	43.4	2.2					140a	20	47.9	2.9
14a	22	55	2.7	174a	22	44.2	2.6					141a	22	45.1	2.5
15a	24	49.6	3.4									142a	24	46.2	3
Ra-226	elevated CO2 soil cores
	core 1 eCO2_1b	core eCO2_1b	core eCO2_1b		core eCO2_1c	core eCO2_1c	core eCO2_1c		core eCO2_2b	core eCO2_2b	core eCO2_2b		core eCO2_2c	core eCO2_2c	core eCO2_2c
sample #	depth (cm)	activity (Bq/Kg)	error (Bq/kg)	sample #	depth (cm)	activity (Bq/Kg)	error (Bq/kg)	sample #	depth (cm)	activity (Bq/Kg)	error (Bq/kg)	sample #	depth (cm)	activity (Bq/Kg)	error (Bq/kg)
16e	1	72.7	10.6	59e	1	47.4	3.5	31e rerun	1	46.8	3.6	143e	1	49.2	3.5
17e	2	44.3	4.3	60e	2	45.5	3.1	32e rerun	2	46.5	2.8	144e	2	43	3.5
18e	3	47.6	1.7	61e	3	47.3	3.9	33e rerun	3	46.4	2.9	145e	3	41.7	3.7
19e	4	52.5	2.5	62e	4	45.5	2.7	34e rerun	4	46.2	2	146e	4	46.1	2.4
20e	5	53.2	5.7	63e	5	53.4	3.4	35e	5	41.1	2.8	147e	5	49.6	3.5
21e	6	53.1	3.6	64e	6	50.1	2	36e	6	45.4	2.6	148e	6	49.6	3.5
22e	7	51.6	3.6	65e	7	51.4	3.9	37e	7	52.6	3.4	149e	7	52.6	2.9
23e	8	55.8	4.1	66e	8	46.2	2.5	38e	8	53.2	3.4	150e	8	50.6	3.5
24e	10	58.9	3.1	67e	10	54.6	3.6	39e	10	45.1	2.3	151e	10	48.1	2.2
25e	12	51.4	2.5	68e	12	33.3	2.4	40e	12	47.6	2.3	152e	12	44	3
26e	14	55.9	3.4	69e	14	50.6	2.4	41e	14	50.7	3.7	153e	14	52.9	2
27e	16	59.7	3.2	70e (rerun)	16	52.5	2.7	42e	16	51.9	3.8	154e	16	41.9	3.4
28e	18	49.8	2	71e	18	44.9	3.2	43e	18	49.7	3	155e	18	47.9	1.5
29e	20	53.9	3.2	72e	20	40.5	1.8	44e	20	54.5	3.3	156e	20	44	3.7
30e	22	46.8	2.2	73e	22	47.7	2.3	45e	22	48.4	3.6	157e	22	49.3	1.9
				74e	24	49	3.7					158e	24	50.1	1.8

## Sheet: bulk density
bulk density	ambient CO2 soil cores
	core aCO2_4a	core aCO2_4a		core aCO2_4c	core aCO2_4c		core aCO2_5a	core aCO2_5a		core aCO2_5c	core aCO2_5c
sample #	depth (cm)	bulk density (g/cm3)	sample #	depth (cm)	bulk density (g/cm3)	sample #	depth (cm)	bulk density (g/cm3)	sample #	depth (cm)	bulk density (g/cm3)
1a	1	0.621315	160a	1	0.678023	46a rerun	1	0.512447	127a	1	0.516301
2a	3	0.559818	161a	2	0.857806	47a rerun	2	0.884879	128a	2	1.0055
3a	4	0.540938	162a	3	0.951489	48a	3	1.07279	129a	3	1.27763
4a	5	0.779331	163a	4	0.721981	49a	4	1.26645	130a	4	1.29497
5a	6	1.1841	164a	5	1.36404	50a	5	1.12555	131a	5	1.38546
6a	7	1.33515	165a	6	1.2502	51a	6	1.33407	132a	6	1.33013
7a	8	1.30017	166a	7	1.12194	52a	7	1.58885	133a	7	1.6732
8a	10	1.09129	167a	8	1.43232	53a	8	1.18453	134a	8	1.10859
9a	12	1.33895	168a	10	1.04614	54a	10	1.39053	135a	10	1.11187
10a	14	1.19537	169a	12	1.11387	55a	12	1.29255	136a	12	1.44517
11a	16	1.18676	170a	14	1.26805	56a	14	1.25508	137a	14	1.31707
12a	17	1.69861	171a	16	1.44385	57a	16	1.05046	138a	16	1.77707
12b	18	1.13839	172a	18	1.10522	58a	18	1.62109	139a	18	1.24499
13a	20	1.10706	173a	20	1.33145	185	25	1.31416	140a	20	1.22194
14a	22	0.606125	174a	22	0.967908	186	30	0.978703	141a	22	1.66431
15a	24	0.8966	181	25	1.77988				142a	24	1.30599
177	25	1.08435	182	30	1.41906				189	25	1.64616
178	30	0.92389							190	30	1.32799
bulk density	elevated CO2 soil cores
	core 1 eCO2_1b	core eCO2_1b		core eCO2_1c	core eCO2_1c		core eCO2_2b	core eCO2_2b		core eCO2_2c	core eCO2_2c
sample #	depth (cm)	bulk density (g/cm3)	sample #	depth (cm)	bulk density (g/cm3)	sample #	depth (cm)	bulk density (g/cm3)	sample #	depth (cm)	bulk density (g/cm3)
16e	1	0.194605	59e	1	0.590156	31e rerun	1	0.503646	143e	1	0.541379
17e	2	0.819344	60e	2	0.905499	32e rerun	2	1.1236	144e	2	0.566567
18e	3	1.20345	61e	3	1.56648	33e rerun	3	1.03141	145e	3	0.514586
19e	4	2.05937	62e	4	0.883101	34e rerun	4	1.2705	146e	4	0.690139
20e	5	0.748529	63e	5	1.31192	35e	5	1.21906	147e	5	0.792977
21e	6	1.62988	64e	6	1.48933	36e	6	1.73973	148e	6	0.846979
22e	7	0.922511	65e	7	1.4631	37e	7	0.849149	149e	7	0.763907
23e	8	1.74364	66e	8	1.22803	38e	8	1.25943	150e	8	0.821797
24e	10	1.20806	67e	10	1.34062	39e	10	1.70034	151e	10	1.48708
25e	12	1.44505	68e	12	0.94903	40e	12	1.06775	152e	12	0.981297
26e	14	0.953703	69e	14	0.878767	41e	14	1.27093	153e	14	1.35739
27e	16	1.32398	70e (rerun)	16	1.38334	42e	16	0.969769	154e	16	1.24499
28e	18	1.2751	71e	18	0.983934	43e	18	1.22626	155e	18	1.20465
29e	20	0.918961	72e	20	1.2037	44e	20	1.25652	156e	20	1.34874
30e	22	1.7891	73e	22	1.55648	45e	22	1.9405	157e	22	0.520188
179	25	1.52051	74e	24	1.05699	183	1.4	1.41445	158e	24	0.856377
180	30	1.72339	175	25	1.03282	184	0.5	1.50206	187	25	1.45826
			176	30	1.72898				188	30	1.76259
