# Supplementary material for: Does elevated atmospheric CO2affect soil carbon burial and soil weathering in a forest ecosystem?
Source: PeerJ. 2018 Jul 27;6:e5356. doi: 10.7717/peerj.5356 (PMC6065474; doi:10.7717/peerj.5356)
Supplement: Supplemental Information 2 — Raw data for concentration of carbon (%) in soil and carbon isotope ratio (d13C/d12C) in soil under elevated CO2 concentration. [file peerj-06-5356-s002.xlsx]

## Sheet: Sheet1
stable isotope ratios (13C/12C) and C%			ambient CO2 soil cores
	aCO2_4a					soil core	aCO2_4c						soil core	aCO2_5a						core	aCO2_5c
sample id	core	depth (cm)	d 13C/12C	C%		sample id	core	depth (cm)	d 13C/12C	C%	note		sample id	core	depth (cm)	d 13C/12C	C%		sample id	core	depth (cm)	d 13C/12C	C%	sample ID
1	aCO2_4a	1	-26.106	2.648	1	160	aCO2_4c	1	-26.609	3.81979	1		46	aCO2_5a	1	-26.9345	3.508	1	127	aCO2_5c	1	-26.4665	3.4965	1
1	aCO2_4a	1	-26.487	2.774	1	161	aCO2_4c	2	-25.666	2.22139	2		47	aCO2_5a	2	-26.381	2.423	2	128	aCO2_5c	2	-25.586	2.525	2
2	aCO2_4a	3	-25.758	2.308	3	162	aCO2_4c	3	-25.636	2.40073	3		48	aCO2_5a	3	-25.909	2.005	3	129	aCO2_5c	3	-25.158	1.952	3
3	aCO2_4a	4	-25.229	2.101	4	163	aCO2_4c	4	-24.946	1.79933	4		49	aCO2_5a	4	-25.301	1.746	4	130	aCO2_5c	4	-24.345	1.504	4
4	aCO2_4a	5	-24.614	1.741	5	164	aCO2_4c	5	-24.488	1.51785	5		50	aCO2_5a	5	-25.03	1.436	5	131	aCO2_5c	5	-24.482	1.518	5
5	aCO2_4a	6	-24.432	1.67	6	165	aCO2_4c	6	-24.498	1.49056	6		51	aCO2_5a	6	-24.338	1.228	6	132	aCO2_5c	6	-23.976	1.268	6
6	aCO2_4a	7	-25.076	1.99	7	166	aCO2_4c	7	-24.321	1.4272	7		52	aCO2_5a	7	-24.1655	1.123	7	133	aCO2_5c	7	-23.999	1.227	7
6	aCO2_4a	7	-24.539	1.76	7	167	aCO2_4c	8	-24.67	1.55738	8		53	aCO2_5a	8	-24.271	1.064	8	134	aCO2_5c	8	-24.506	1.352	8
7	aCO2_4a	8	-24.172	1.548	8	168	aCO2_4c	10	-24.319	1.40836	10		54	aCO2_5a	10	-23.871	1.031	10	135	aCO2_5c	10	-25.027	1.659	10
8	aCO2_4a	10	-24.168	1.448	10	169	aCO2_4c	12	-25.009	1.80175	12		55	aCO2_5a	12	-23.433	0.889	12	136	aCO2_5c	12	-24.432	1.496	12
9	aCO2_4a	12	-23.889	1.302	12	170	aCO2_4c	14	-25.176	1.84378	14		56	aCO2_5a	14	-23.509	0.932	14	137	aCO2_5c	14	-23.186	1.078	14
10	aCO2_4a	14	-24.176	1.302	14	171	aCO2_4c	16	-24.282	1.29591	16		57	aCO2_5a	16	-23.333	0.924	16	138	aCO2_5c	16	-23.1185	1.07	16
11	aCO2_4a	16	-23.65	0.998	16	172	aCO2_4c	18	-24.278	1.2652	18		58	aCO2_5a	18	-23.185	0.812	18	139	aCO2_5c	18	-22.367	0.686	18
12b	aCO2_4a	18	-22.998	0.853	18	173	aCO2_4c	20	-24.266	1.257	20		185*	aCO2_5a	22.5	-22.977	0.892	25	140	aCO2_5c	20	-21.906	0.514	20
13	aCO2_4a	20	-23.14	0.801	20	174	aCO2_4c	22	-22.669	0.751	22		186*	aCO2_5a	27.5	-22.472	0.724	30	141	aCO2_5c	22	-21.717	0.527	22
14	aCO2_4a	22	-23.082	0.751	22	181*	aCO2_4c	25	-21.306	0.646	25								142	aCO2_5c	24	-21.306	0.411	24
15	aCO2_4a	24	-22.85	0.693	24	182*	aCO2_4c	30	-22.687	0.69	30								189*	aCO2_5c	25	-22.306	0.608	25
177*	aCO2_4a	25	-23.047	0.999	25														190*	aCO2_5c	30	-22.027	0.476	30
178*	aCO2_4a	30	-22.706	0.841	30
* these samples were collected later from 20-25 cm and 25-30 cm
stable isotope ratios (13C/12C) and C%			elevated CO2 soil cores
soil core	eCO2_1b						core	eCO2_1c					core	eCO2_2b					core	eCO2_2c
sample id	core	depth (cm)	d 13C/12C	C%		sample id	core	depth (cm)	d 13C/12C	C%			sample id	core	depth (cm)	d 13C/12C	C%		sample id	core	depth (cm)	d 13C/12C	C%	note
16	eCO2_1b	1	-32.61	4.702	1	59	eCO2_1c	1	-33.377	4.052	1		31 rerun	eCO2_2b	1	-34.647	4.4475	1	143	eCO2_2c	1	-33.935	4.4909	1
16	eCO2_1b	1	-32.958	4.649	1	60	eCO2_1c	2	-30.181	2.16	2		32 rerun	eCO2_2b	2	-32.629	3.143	2	144	eCO2_2c	2	-32.536	3.53427	2
17	eCO2_1b	2	-32.301	3.416	2	61	eCO2_1c	3	-29.957	2.252	3		33 rerun	eCO2_2b	3	-31.413	1.99	3	145	eCO2_2c	3	-30.812	2.70621	3
18	eCO2_1b	3	-31.255	2.524	3	62	eCO2_1c	4	-32.096	3.023	4		34 rerun	eCO2_2b	4	-29.058	1.476	4	146	eCO2_2c	4	-28.818	1.95485	4
19	eCO2_1b	4	-29.56	1.806	4	63	eCO2_1c	5	-28.317	1.583	5		35	eCO2_2b	5	-28.244	1.38	5	147	eCO2_2c	5	-27.257	1.60097	5
20	eCO2_1b	5	-27.631	1.46	5	64	eCO2_1c	6	-28.088	1.673	6		36	eCO2_2b	6	-26.665	1.149	6	148	eCO2_2c	6	-27.072	1.56573	6
21	eCO2_1b	6	-26.225	1.29	6	65	eCO2_1c	7	-26.81	1.427	7		37	eCO2_2b	7	-26.428	1.155	7	149	eCO2_2c	7	-26.22	1.5067	7
21	eCO2_1b	6	-28.524	1.509	6	66	eCO2_1c	8	-25.631	1.278	8		38	eCO2_2b	8	-25.748	1.089	8	150	eCO2_2c	8	-25.707	1.38464	8
22	eCO2_1b	7	-26.66	1.178	7	67	eCO2_1c	10	-24.036	0.989	10		39	eCO2_2b	10	-25.442	1.178	10	151	eCO2_2c	10	-24.878	1.24351	10
23	eCO2_1b	8	-26.806	1.12	8	68	eCO2_1c	12	-25.968	1.474	12		40	eCO2_2b	12	-25.017	1.135	12	152	eCO2_2c	12	-25.171	1.76645	12
24	eCO2_1b	10	-25.769	0.958	10	69	eCO2_1c	14	-25.389	1.367	14		41	eCO2_2b	14	-24.536	0.992	14	153	eCO2_2c	14	-24.823	1.511	14
25	eCO2_1b	12	-25.67	0.899	12	70	eCO2_1c	16	-24.231	0.884	16		42	eCO2_2b	16	-24.246	0.817	16	154	eCO2_2c	16	-24.488	1.436	16
26	eCO2_1b	14	-25.152	0.868	14	71	eCO2_1c	18	-25.406	1.286	18		43	eCO2_2b	18	-24.848	0.852	18	155	eCO2_2c	18	-24.627	1.41	18
27	eCO2_1b	16	-23.537	0.791	16	72	eCO2_1c	20	-23.567	0.847	20		44	eCO2_2b	20	-24.745	0.836	20	156	eCO2_2c	20	-23.548	1.02	20
28	eCO2_1b	18	-24.123	0.755	18	73	eCO2_1c	22	-23.711	0.838	22		45	eCO2_2b	22	-23.482	0.804	22	157	eCO2_2c	22	-23.689	0.985	22
29	eCO2_1b	20	-23.974	0.662	20	74	eCO2_1c	24	-23.544	0.886	24		183*	eCO2_2b	22.5	-23.95	1.1	22.5	158	eCO2_2c	24	-22.958	0.966	24
30	eCO2_1b	22	-25.459	0.841	22	175*	eCO2_1c	22.5	-23.29	0.629	22.5		184*	eCO2_2b	27.5	-23.704	1.113	27.5	187*	eCO2_2c	22.5	-25.832	1.143	22.5
179*	eCO2_1b	22.5	-24.894	0.946	25	176*	eCO2_1c	27.5	-22.974	0.613	27.5								188*	eCO2_2c	27.5	-24.103	0.957	27.5
180*	eCO2_1b	27.5	-23.036	0.7	30
* these samples were collected later from 20-25 cm and 25-30 cm

## Sheet: Sheet2
Cs-137				Ra-226					K-40
ambient CO2	average aCO2	std deviation aCO2			core aCO2_4a	average aCO2	std deviation aCO2			core aCO2_4a	average aCO2	std deviation aCO2
depth (cm)	activity (Bq/cm^3)				depth (cm)	Bq/cm^3				depth (cm)	activity (Bq/cm3)
0.5	0.00435871	0.00180127			0.5	0.0266916	0.00490707			0.5	0.252566	0.046064	0.5
1.5	0.00656222	0.00309346			1.5	0.0336231	0.00842035			1.5	0.460599	0.00479253	1.5
2.5	0.0056587	0.000870863			2.5	0.046852	0.00553686			2.5	0.429098	0.196379	2.5
3.5	0.00501177	0.00208462			3.5	0.0477163	0.014041			3.5	0.474127	0.258383	3.5
4.5	0.00809625	0.00305841			4.5	0.0587612	0.00590733			4.5	0.598605	0.0547499	4.5
5.5	0.00898423	0.00439571			5.5	0.0625702	0.00192607			5.5	0.68063	0.0202385	5.5
6.5	0.010662	0.00698622			6.5	0.0680021	0.0117502			6.5	0.777352	0.122495	6.5
7.5	0.0124208	0.00753864			7.5	0.0561999	0.00482499			7.5	0.667255	0.107078	7.5
9	0.00936184	0.00532438			9	0.0571777	3.18676e-06			9	0.627865	0.0333239	9
11	0.0128852	0.00719544			11	0.0618434	0.00107866			11	0.714272	0.0134845	11
13	0.0118648	0.0042262			13	0.059998	0.00559604			13	0.683598	0.0195767	13
15	0.0102603	0.0027692			15	0.0680776	0.00478515			15	0.735043	0.021502	15
17	0.00913134	0.000643961			17	0.0658607	0.00452207			17	0.762364	0.0860172	17
19	0.00496453	0.000430543			19	0.0569964	0.00216997			19	0.649927	0.00832546	19
21	0.000251258	0.000150008			21	0.0565599	0.0261639			21	0.662289	0.293423	21
23	4.483e-05	6.33992e-05			23	0.052404	0.0112184			23	0.582586	0.0593072	23
elevated CO2	average eCO2	std deviation eCO2			core 1 eCO2_1b	average eCO2	std deviation eCO2			core 1 eCO2_1b	average eCO2	std deviation eCO2	core 1 eCO2_1b
depth (cm)	activity (Bq/cm^3)				depth (cm)	Bq/cm^3				depth (cm)	activity (Bq/cm3)		depth (cm)
0.5	0.00379821	0.000266764			0.5	0.0230819	0.00285859			0.5	0.189332	0.0639391	0.5
1.5	0.00710237	0.000229144			1.5	0.0385268	0.000313672			1.5	0.435746	0.00532258	1.5
2.5	0.00893845	0.00327541			2.5	0.0501736	0.0219426			2.5	0.542316	0.177508	2.5
3.5	0.00942229	0.00190577			3.5	0.0597026	0.0204302			3.5	0.691854	0.207193	3.5
4.5	0.00814796	0.000276489			4.5	0.0498284	0.00722778			4.5	0.532772	0.0295756	4.5
5.5	0.0124532	0.00168938			5.5	0.070539	0.0142015			5.5	0.778274	0.113441	5.5
6.5	0.00716865	0.000268766			6.5	0.051913	0.0134203			6.5	0.533624	0.134782	6.5
7.5	0.0145338	0.00889082			7.5	0.0656537	0.0160674			7.5	0.697056	0.150393	7.5
9	0.0152901	0.00614443			9	0.0731416	0.00136498			9	0.796295	0.120495	9
11	0.0116371	0.00190481			11	0.0499701	0.00419874			11	0.562348	0.00573969	11
13	0.0129135	0.00524816			13	0.0585049	0.0135993			13	0.62656	0.153793	13
15	0.0102475	0.00228807			15	0.0635408	0.0173844			15	0.765452	0.186457	15
17	0.00890006	0.00200423			17	0.0565816	0.00387815			17	0.659612	0.0181834	17
19	0.00226098	0.00129254			19	0.0565267	0.0104451			19	0.646846	0.17018	19
21	0.00567012	0.00701157			21	0.0693849	0.0135796			21	0.83177	0.182496	21
23	0.00233395	0.00327648			23	0.0473486	0.00628492			23	0.528845	0.0712586	23
